# Supplementary material for: Caffeine assisted one-step synthesis of flower-like gold nanochains and their catalytic behaviors
Source: Royal Society of Chemistry journal article supplement (doi:10.1039/c3ra41875h), 2013-01-01
Supplement: c3ra41875h.pdf [file c3ra41875h.pdf]

## Supporting Information

### **Caffeine assisted one-step synthesis of flower-like gold nanochains and their catalytic behaviors**

Ai-Jun Wang, Su-Fang Qin, Dan-Ling Zhou, Lin-Yi Cai, Jian-Rong Chen, Jiu-Ju Feng\*

*College of Chemistry and Life Science, College of Geography and Environmental Science,  
Zhejiang Normal University, Jinhua, 321004, China*

\*Corresponding author: Jiu-Ju Feng (Email: [jjfeng@zjnu.cn](mailto:jjfeng@zjnu.cn)).

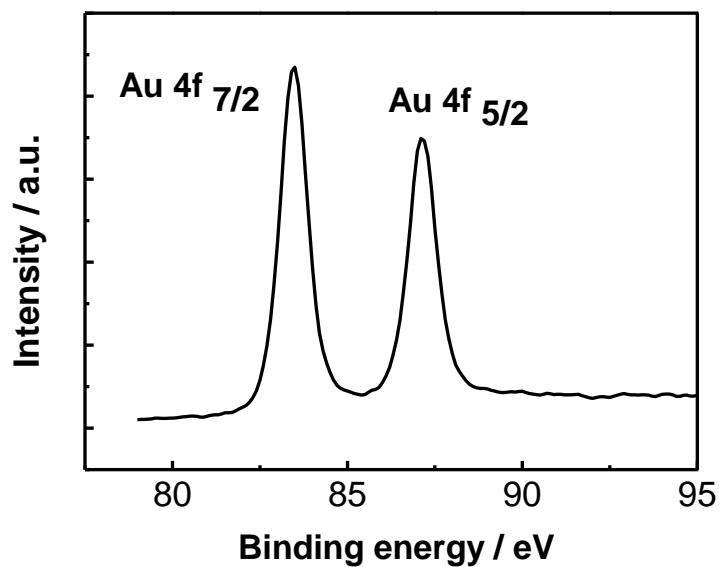

**Figure S1** XPS spectra of Au from the flower-like gold nanochains.

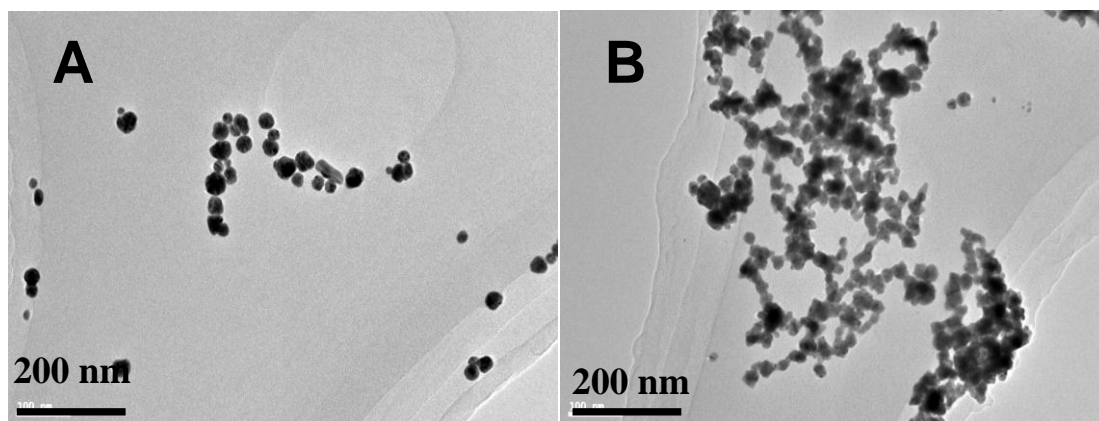

**Figure S2** TEM images of the products obtained using ascorbic acid (A) and  $\text{NaBH}_4$  (B) as reducing agents.

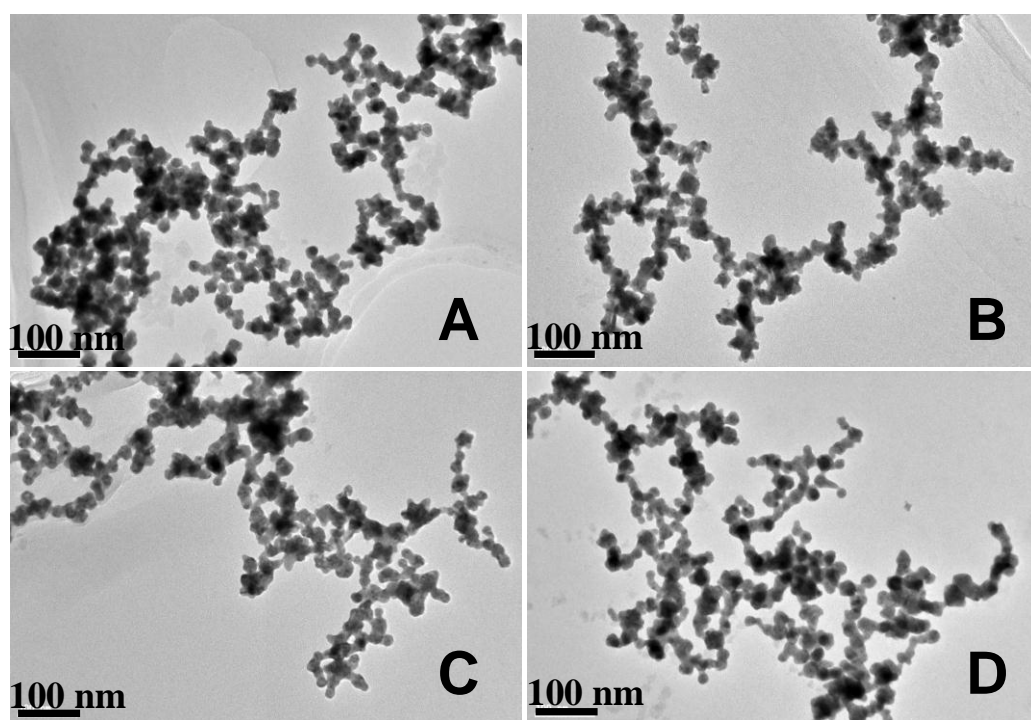

**Figure S3** TEM images of the products obtained with different amounts of hydrazine:

20  $\mu\text{L}$  (A), 40  $\mu\text{L}$  (B), 100  $\mu\text{L}$  (C), and 150  $\mu\text{L}$  (D).

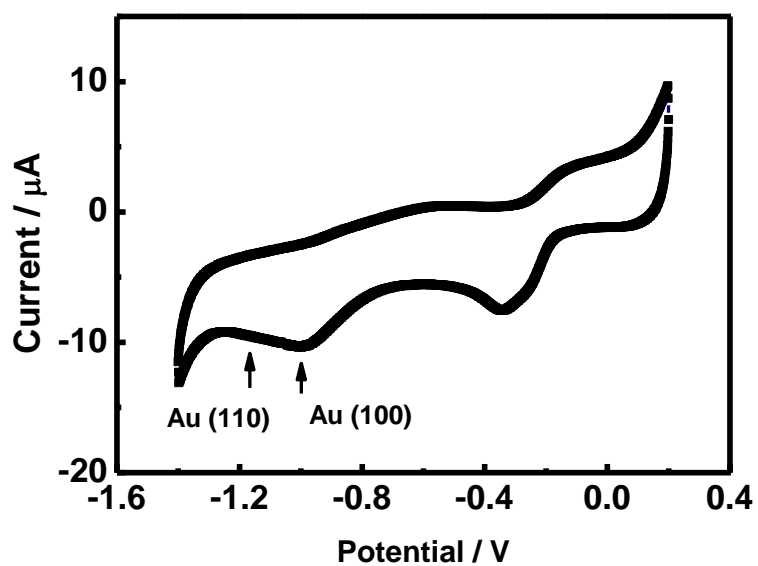

**Figure S4.** Cyclic voltammograms of caffeine adsorbed on the flower-like Au nanochains modified electrode in a 0.5 M KOH solution at  $50 \text{ mV s}^{-1}$ .
